# Supplementary material
Source: Springer Nature journal article supplement (https://www.springermedizin.de/resource/supplementary/12906_2012_1064_MOESM5_ESM.pdf/9520360)

15 min

6 h

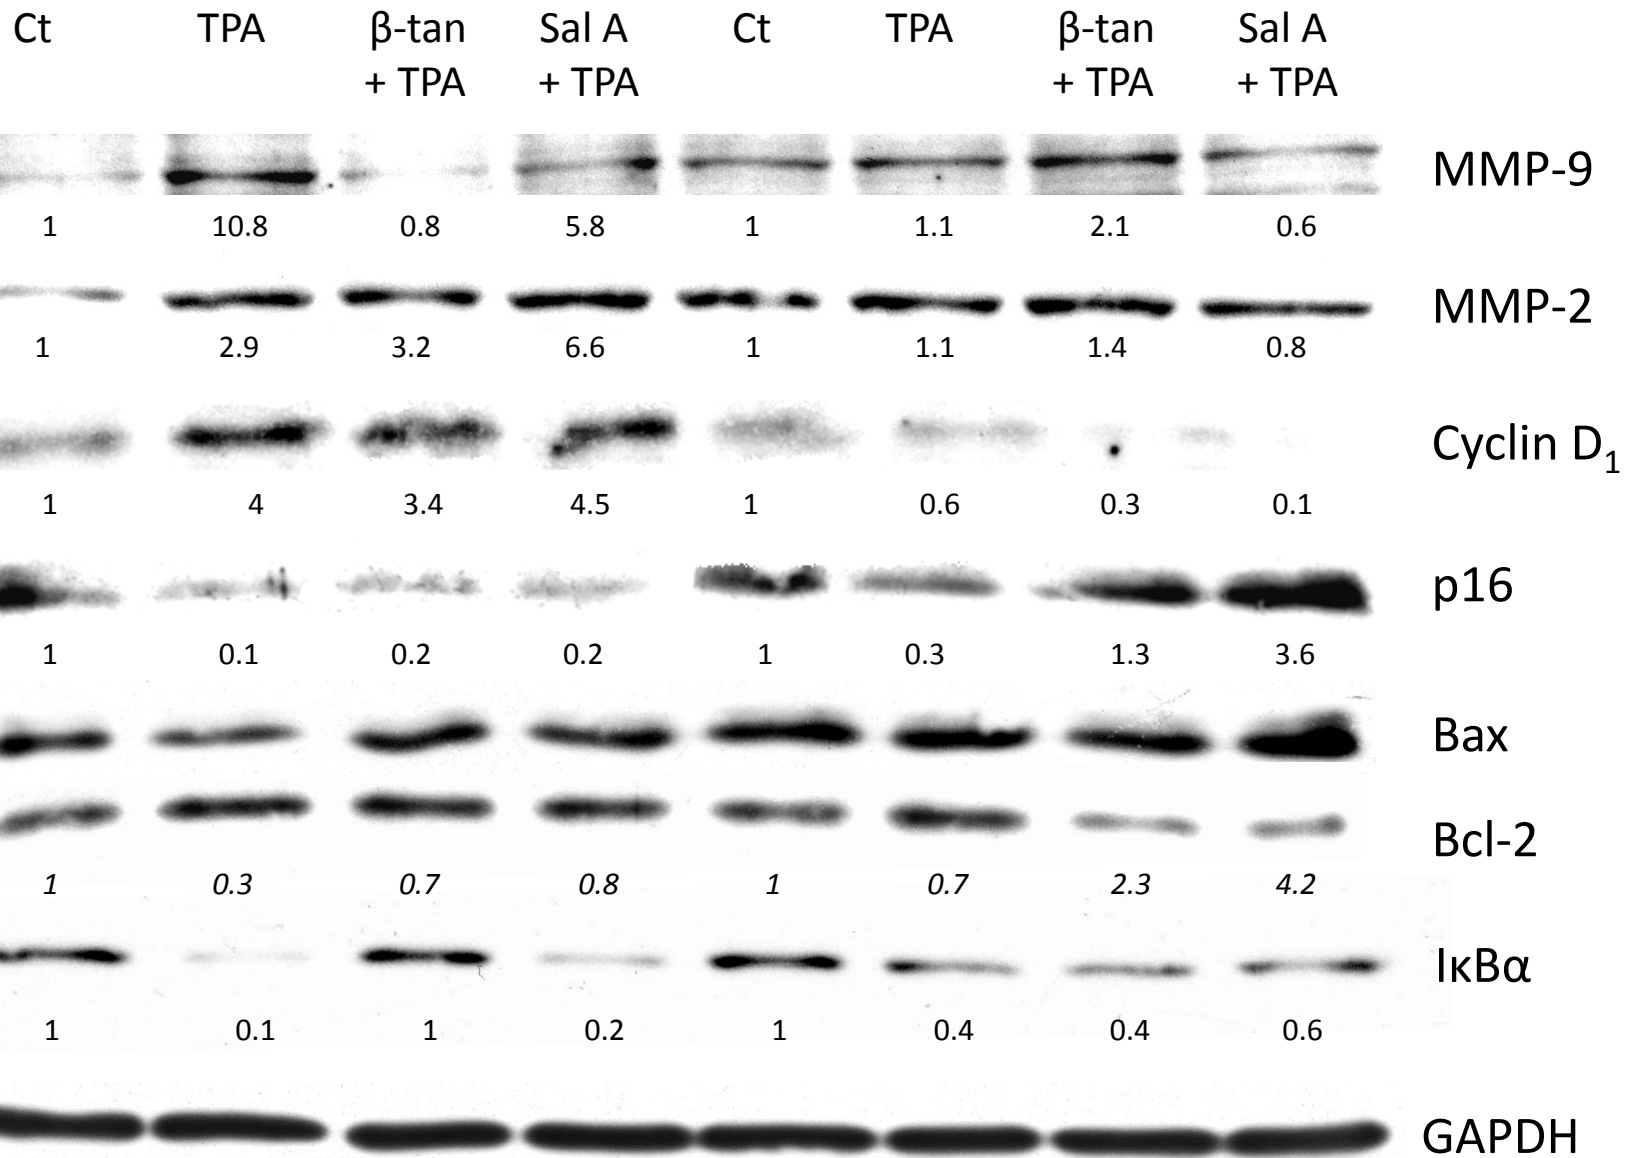

Supplement: MOESM5 [file 9520360]
